# Supplementary material for: The entire chloroplast genome sequence of Asparagus setaceus (Kunth) Jessop: Genome structure, gene composition, and phylogenetic analysis in Asparagaceae
Source: Open Life Sci. 2022 Nov 23;17(1):1541–54. doi: 10.1515/biol-2022-0497 (PMC9684740; doi:10.1515/biol-2022-0497)
Supplement: Supplementary Table [file Supplementary-table-1.xlsx]

## Sheet: Sheet1
start	end	FPr1(5'-3')	Tm	Size	RPr1(5'-3')	Tm	Size	PSize
3363	3578	CCAAGGTTAGCACGGTTGAT	59.993	20	GGCCGATTGATCTTCCAATA	59.862	20	215
4934	5173	TTACGGGCATTTCAGAATGA	59.112	20	TTTGCGAAGATTAGGTTCGG	60.202	20	239
8509	8756	CATATGGATGGGATGGGGTA	60.23	20	CCAAAATCGATTCGTTGGAC	60.309	20	247
8654	8828	GCAACCCTATCGCTCTTTTG	59.845	20	AAAATTAGTGCCTGATGCGG	60.096	20	174
22410	22672	GCAACCCTATCGCTCTTTTG	59.845	20	AGCCTTACGGCTCCAATTCT	60.228	20	262
28007	28210	CCGCATCAGGCACTAATTTT	60.096	20	TGATCCTTACCGGATCATTCA	60.281	21	203
42876	43067	TCCGGTAAGGATCAACTCAAA	59.555	21	CACATTTGGATGAAGCAACG	60.111	20	191
60326	60517	TCCGGTAAGGATCAACTCAAA	59.555	21	CACATTTGGATGAAGCAACG	60.111	20	191
60848	61079	TTCGTTGCTTCATCCAAATG	59.664	20	TCCGATCCACTCGTTTTTCT	59.67	20	231
70764	70938	GGCAAACCCATCATTTGACT	59.797	20	GTTGTGCCAATCCAACACAA	60.413	20	174
71986	72128	ATTTGTGTTGGATTGGCACA	59.823	20	CCACCAACAAACAAAGGACA	59.435	20	142
73101	73377	TTGTTTGTTGGTGGATTCCC	60.594	20	AGTGGGTTTTTACGATCCGA	59.429	20	276
77858	78134	TTGTTTGTTGGTGGATTCCC	60.594	20	AGTGGGTTTTTACGATCCGA	59.429	20	276
78673	78783	ATCGAACATCAATTGCAACG	59.548	20	CGAGCCGTATGAGGAGAAAA	60.344	20	110
82133	82412	CTCCTTTTCAAAATGGCAGC	59.823	20	ATTGATTCATTTATCGGGGG	58.575	20	279
107283	107561	GCACGTTGCTTTCTACCACA	59.911	20	CATCCCGAACAATCTGTTGA	59.496	20	278
110166	110360	GTCATTCGTCAATCCCAACC	60.181	20	TTTCTTCGAACTCTCCCCAA	59.784	20	194
114478	114640	TAAGGACCCCACAATACCCA	60.044	20	CGCTATTTTGACATAACCCCC	60.552	21	162
114489	114740	TCTTATCTAACGATCCGGGC	59.138	20	TTTGAATTGGGAGAGATGGC	60.014	20	251
126686	126949	TTTTTAGATGATGTGACACGTGAA	59.558	24	AAATTGAATTACTGATCAAATTCGT	57.385	25	263
132569	132832	TTTTTAGATGATGTGACACGTGAA	59.558	24	AAATTGAATTACTGATCAAATTCGT	57.385	25	263
133089	133229	CGGGCCATTACTTGTTTTGT	59.861	20	CATAGGAATAGGGATGGGCA	59.739	20	140
141598	141865	AAAATGCCCATCCCTATTCC	59.984	20	TCAAATAAAGCTTGTCCCTTGAA	60.115	23	267
